# Supplementary material
Source: publisher figshare collection journal article supplement (https://tandf.figshare.com/ndownloader/files/13137452)
Supplement: Supplementary file 1 [file 13137452]

**Table S1** Design matrix and responses in Plackett–Burman Design (PBD).

| Run | A | B | C | D | E | %Recovery |
| --- | --- | --- | --- | --- | --- | --- |
| 1 | 7 | 0.25 | 700 | 8.5 | 100 | 65.690 |
| 2 | 10 | 0.00 | 500 | 2.0 | 150 | 6.342 |
| 3 | 4 | 0.00 | 900 | 15.0 | 150 | 105.410 |
| 4 | 7 | 0.25 | 700 | 8.5 | 100 | 56.110 |
| 5 | 10 | 0.00 | 900 | 15.0 | 50 | 79.876 |
| 6 | 10 | 0.00 | 900 | 15.0 | 50 | 81.208 |
| 7 | 10 | 0.50 | 500 | 15.0 | 150 | 15.439 |
| 8 | 4 | 0.50 | 500 | 2.0 | 50 | 1.293 |
| 9 | 7 | 0.25 | 700 | 8.5 | 100 | 66.040 |
| 10 | 4 | 0.00 | 500 | 2.0 | 50 | 1.364 |
| 11 | 4 | 0.00 | 900 | 15.0 | 150 | 99.469 |
| 12 | 7 | 0.25 | 700 | 8.5 | 100 | 57.370 |
| 13 | 4 | 0.00 | 500 | 15.0 | 150 | 12.576 |
| 14 | 4 | 0.50 | 900 | 15.0 | 50 | 76.944 |
| 15 | 10 | 0.50 | 900 | 2.0 | 150 | 73.167 |
| 16 | 10 | 0.50 | 500 | 15.0 | 150 | 14.523 |
| 17 | 4 | 0.50 | 500 | 2.0 | 50 | 1.103 |
| 18 | 4 | 0.50 | 900 | 2.0 | 150 | 57.845 |
| 19 | 7 | 0.25 | 700 | 8.5 | 100 | 65.040 |
| 20 | 10 | 0.50 | 500 | 15.0 | 50 | 5.856 |
| 21 | 10 | 0.00 | 900 | 15.0 | 50 | 76.890 |
| 22 | 10 | 0.00 | 500 | 2.0 | 150 | 3.345 |
| 23 | 10 | 0.00 | 500 | 2.0 | 150 | 4.682 |
| 24 | 4 | 0.50 | 500 | 2.0 | 50 | 1.635 |
| 25 | 10 | 0.50 | 500 | 15.0 | 50 | 4.513 |
| 26 | 4 | 0.50 | 900 | 2.0 | 150 | 60.114 |
| 27 | 10 | 0.50 | 500 | 15.0 | 150 | 11.578 |
| 28 | 4 | 0.00 | 900 | 15.0 | 150 | 97.453 |
| 29 | 4 | 0.00 | 500 | 15.0 | 150 | 9.100 |
| 30 | 4 | 0.50 | 900 | 15.0 | 50 | 73.994 |
| 31 | 7 | 0.25 | 700 | 8.5 | 100 | 66.690 |
| 32 | 4 | 0.00 | 500 | 2.0 | 50 | 1.355 |
| 33 | 10 | 0.00 | 900 | 2.0 | 50 | 40.000 |
| 34 | 10 | 0.50 | 900 | 2.0 | 150 | 75.975 |
| 35 | 10 | 0.00 | 900 | 2.0 | 50 | 41.270 |
| 36 | 4 | 0.00 | 500 | 2.0 | 50 | 1.606 |
| 37 | 4 | 0.50 | 900 | 15.0 | 50 | 79.273 |
| 38 | 4 | 0.50 | 900 | 2.0 | 150 | 73.707 |
| 39 | 10 | 0.50 | 500 | 15.0 | 50 | 3.815 |
| 40 | 10 | 0.00 | 900 | 2.0 | 50 | 40.200 |
| 41 | 4 | 0.00 | 500 | 15.0 | 150 | 16.884 |
| 42 | 10 | 0.50 | 900 | 2.0 | 150 | 67.395 |

**Table S2** Design matrix and responses in Central Composite Design (CCD).

| Run | M1 | M2 | M3 | M4 | %Recovery |
| --- | --- | --- | --- | --- | --- |
| 1 | 7.5 | 700 | 175 | 12.5 | 49.960 |
| 2 | 9.0 | 600 | 100 | 10.0 | 22.334 |
| 3 | 7.5 | 700 | 125 | 12.5 | 47.136 |
| 4 | 7.5 | 700 | 125 | 12.5 | 45.125 |
| 5 | 9.0 | 600 | 150 | 15.0 | 36.639 |
| 6 | 7.5 | 700 | 125 | 12.5 | 48.348 |
| 7 | 7.5 | 700 | 125 | 12.5 | 45.931 |
| 8 | 7.5 | 700 | 125 | 12.5 | 48.824 |
| 9 | 6.0 | 600 | 100 | 15.0 | 7.815 |
| 10 | 7.5 | 900 | 125 | 12.5 | 101.088 |
| 11 | 7.5 | 700 | 175 | 12.5 | 51.203 |
| 12 | 7.5 | 700 | 125 | 12.5 | 47.542 |
| 13 | 7.5 | 700 | 125 | 7.5 | 37.950 |
| 14 | 6.0 | 600 | 150 | 15.0 | 24.174 |
| 15 | 7.5 | 700 | 125 | 12.5 | 45.931 |
| 16 | 6.0 | 600 | 100 | 15.0 | 6.446 |
| 17 | 7.5 | 500 | 125 | 12.5 | 12.702 |
| 18 | 9.0 | 800 | 100 | 10.0 | 66.076 |
| 19 | 6.0 | 800 | 150 | 10.0 | 67.470 |
| 20 | 6.0 | 800 | 100 | 10.0 | 71.727 |
| 21 | 9.0 | 600 | 150 | 10.0 | 30.500 |
| 22 | 7.5 | 700 | 125 | 17.5 | 29.396 |
| 23 | 10.5 | 700 | 125 | 12.5 | 49.545 |
| 24 | 6.0 | 600 | 150 | 10.0 | 25.500 |
| 25 | 7.5 | 700 | 125 | 17.5 | 29.396 |
| 26 | 6.0 | 600 | 150 | 15.0 | 25.973 |
| 27 | 6.0 | 800 | 150 | 15.0 | 69.872 |
| 28 | 6.0 | 800 | 150 | 15.0 | 70.258 |
| 29 | 4.5 | 700 | 125 | 12.5 | 42.707 |
| 30 | 7.5 | 900 | 125 | 12.5 | 101.942 |
| 31 | 7.5 | 700 | 75 | 12.5 | 32.391 |
| 32 | 7.5 | 700 | 125 | 12.5 | 48.759 |
| 33 | 9.0 | 600 | 100 | 15.0 | 14.504 |
| 34 | 9.0 | 600 | 100 | 15.0 | 14.929 |
| 35 | 6.0 | 600 | 100 | 10.0 | 20.782 |
| 36 | 9.0 | 600 | 150 | 10.0 | 31.322 |
| 37 | 7.5 | 700 | 125 | 12.5 | 44.851 |
| 38 | 7.5 | 700 | 125 | 12.5 | 46.737 |
| 39 | 9.0 | 800 | 100 | 15.0 | 61.512 |
| 40 | 7.5 | 700 | 125 | 7.5 | 36.657 |
| 41 | 6.0 | 600 | 100 | 10.0 | 20.790 |
| 42 | 10.5 | 700 | 125 | 12.5 | 49.670 |
| 43 | 6.0 | 800 | 100 | 15.0 | 62.659 |
| 44 | 9.0 | 600 | 100 | 10.0 | 21.552 |
| 45 | 9.0 | 800 | 100 | 15.0 | 61.910 |
| 46 | 6.0 | 600 | 150 | 10.0 | 24.482 |
| 47 | 9.0 | 800 | 100 | 10.0 | 68.518 |
| 48 | 7.5 | 700 | 125 | 12.5 | 47.542 |
| 49 | 9.0 | 600 | 150 | 15.0 | 36.078 |
| 50 | 7.5 | 700 | 125 | 12.5 | 44.714 |
| 51 | 7.5 | 700 | 125 | 12.5 | 47.840 |
| 52 | 6.0 | 800 | 150 | 10.0 | 67.542 |
| 53 | 9.0 | 800 | 150 | 15.0 | 72.151 |
| 54 | 9.0 | 800 | 150 | 15.0 | 73.328 |
| 55 | 6.0 | 800 | 100 | 10.0 | 73.328 |
| 56 | 9.0 | 800 | 150 | 10.0 | 67.380 |
| 57 | 7.5 | 500 | 125 | 12.5 | 12.103 |
| 58 | 7.5 | 700 | 125 | 12.5 | 44.722 |
| 59 | 4.5 | 700 | 125 | 12.5 | 43.046 |
| 60 | 7.5 | 700 | 75 | 12.5 | 32.391 |
| 61 | 6.0 | 800 | 100 | 15.0 | 62.659 |
| 62 | 9.0 | 800 | 150 | 10.0 | 67.856 |
